# Supplementary material for: An evaluation of computational methods for aggregate data meta-analyses of diagnostic test accuracy studies
Source: Springer Nature journal article supplement (doi:10.1186/s12874-024-02217-2), 2024-05-10
Supplement: MOESM1 [file 27076430]

An appendix to “An evaluation of computational methods for aggregate data meta-analyses of diagnostic test accuracy studies” by Yixin Zhao, Bilal Khan, and Zelalem F. Negeri

## Appendix A Application of the PQL algorithm to the two motivating meta-analyses

**Table A1:** Aggregate DTA data for the Vonasek et al. (2021) meta-analysis.  $n_1$  (TP+FN) and  $n_2$  (TN+FP) denote the number of diseased and non-diseased participants, respectively.

| Author         | $n_1$ | TP  | FN  | $n_2$  | TN     | FP    |
|----------------|-------|-----|-----|--------|--------|-------|
| Birungi 2018   | 4     | 4   | 0   | 212    | 179    | 33    |
| Kruk 2008      | 33    | 25  | 8   | 219    | 168    | 51    |
| Schwoebel 2020 | 55    | 35  | 20  | 1903   | 753    | 1150  |
| Triasih 2015a  | 21    | 21  | 0   | 248    | 171    | 77    |
| Aggerbeck 2018 | 18    | 12  | 6   | 217    | 81     | 136   |
| Kruk 2008      | 33    | 25  | 8   | 219    | 168    | 51    |
| Schwoebel 2020 | 55    | 35  | 20  | 1903   | 753    | 1150  |
| Sawry 2018     | 7     | 4   | 3   | 1336   | 1295   | 41    |
| Vonasek 2021   | 1212  | 742 | 470 | 200580 | 178099 | 22481 |
| Jaganath 2013  | 79    | 8   | 71  | 682    | 642    | 40    |
| Tieu 2014      | 21    | 5   | 16  | 137    | 112    | 25    |
| Togun 2015     | 62    | 22  | 40  | 418    | 303    | 115   |
| Jaganath 2013  | 79    | 8   | 71  | 682    | 642    | 40    |
| Portevin 2014  | 38    | 21  | 17  | 75     | 46     | 29    |
| Rose 2012      | 33    | 15  | 18  | 178    | 84     | 94    |
| Tieu 2014      | 21    | 5   | 16  | 137    | 112    | 25    |
| Togun 2015     | 62    | 22  | 40  | 418    | 303    | 115   |
| Portevin 2014  | 18    | 12  | 6   | 63     | 39     | 24    |
| Togun 2015     | 21    | 10  | 11  | 459    | 332    | 127   |

**Table A2:** Aggregate DTA data for the Jullien et al. (2020) meta-analysis.  $n_1$  (TP+FN) and  $n_2$  (TN+FP) denote the number of diseased and non-diseased participants, respectively.

| Author          | $n_1$ | TP   | FN | $n_2$ | TN  | FP  |
|-----------------|-------|------|----|-------|-----|-----|
| Chanteau 2003a  | 182   | 151  | 31 | 509   | 381 | 128 |
| Rajerison 2020a | 1328  | 1328 | 0  | 991   | 667 | 324 |
| Rajerison 2020b | 22    | 22   | 0  | 11    | 9   | 2   |
| Rajerison 2020c | 57    | 57   | 0  | 94    | 71  | 23  |
| Riehm 2011      | 47    | 47   | 0  | 102   | 61  | 41  |
| Bertherat 2011  | 4     | 4    | 0  | 92    | 73  | 19  |
| Rajerison 2020d | 40    | 40   | 0  | 109   | 64  | 45  |
| Rajerison 2020e | 4     | 1    | 3  | 63    | 40  | 23  |
| Rajerison 2020f | 8     | 8    | 0  | 33    | 27  | 6   |

## Appendix B Complete Results for Simulation Data

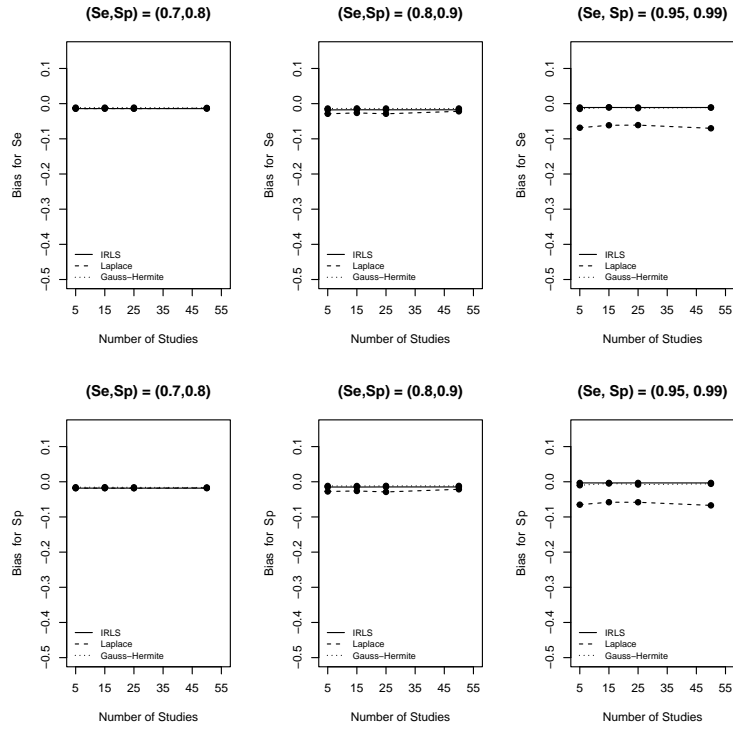

**Fig. B1:** Bias for sensitivity (Se) and specificity (Sp) based on the IRWLS (solid line), Laplace approximation (dashed line) and Gauss-Hermite quadrature (dotted line) when  $\sigma_1^2 = 1.59$ ,  $\sigma_2^2 = 1.83$ ,  $\sigma_{12} = -0.34$ ,  $n_1 = 100$ , and  $n_2 = 200$

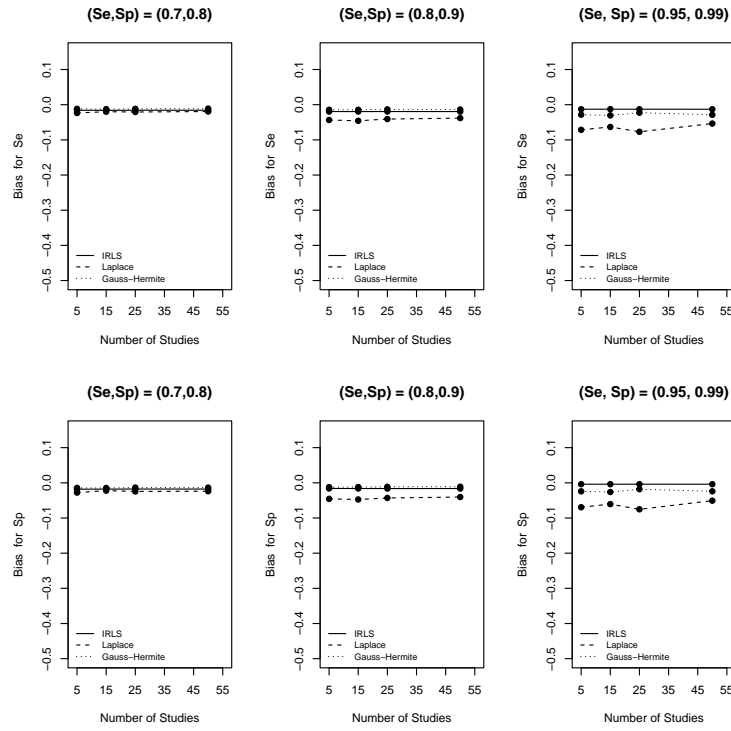

**Fig. B2:** Bias for sensitivity (Se) and specificity (Sp) based on the IRWLS (solid line), Laplace approximation (dashed line) and Gauss-Hermite quadrature (dotted line) when  $\sigma_1^2 = 1.59$ ,  $\sigma_2^2 = 1.83$ ,  $\sigma_{12} = -0.34$ ,  $n_1 = 50$ , and  $n_2 = 100$

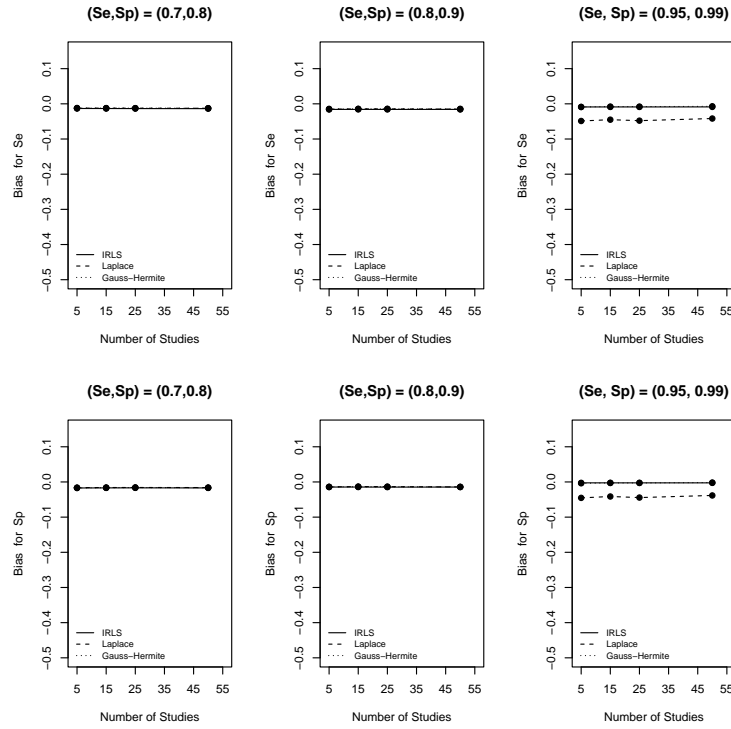

**Fig. B3:** Bias for sensitivity (Se) and specificity (Sp) based on the IRWLS (solid line), Laplace approximation (dashed line) and Gauss-Hermite quadrature (dotted line) when  $\sigma_1^2 = 1.59$ ,  $\sigma_2^2 = 1.83$ ,  $\sigma_{12} = -0.7$ ,  $n_1 = 300$ , and  $n_2 = 500$

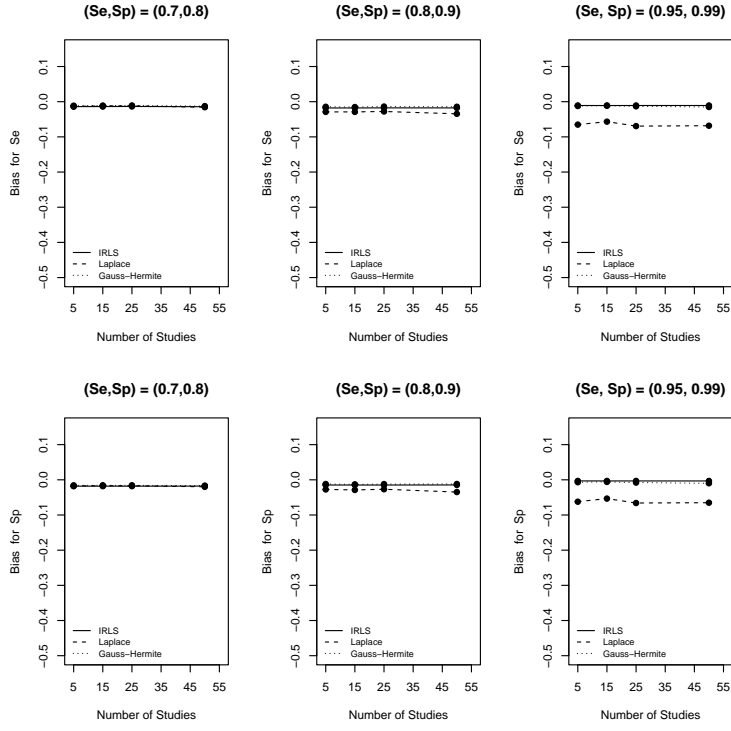

**Fig. B4:** Bias for sensitivity (Se) and specificity (Sp) based on the IRWLS (solid line), Laplace approximation (dashed line) and Gauss-Hermite quadrature (dotted line) when  $\sigma_1^2 = 1.59$ ,  $\sigma_2^2 = 1.83$ ,  $\sigma_{12} = -0.7$ ,  $n_1 = 100$ , and  $n_2 = 200$

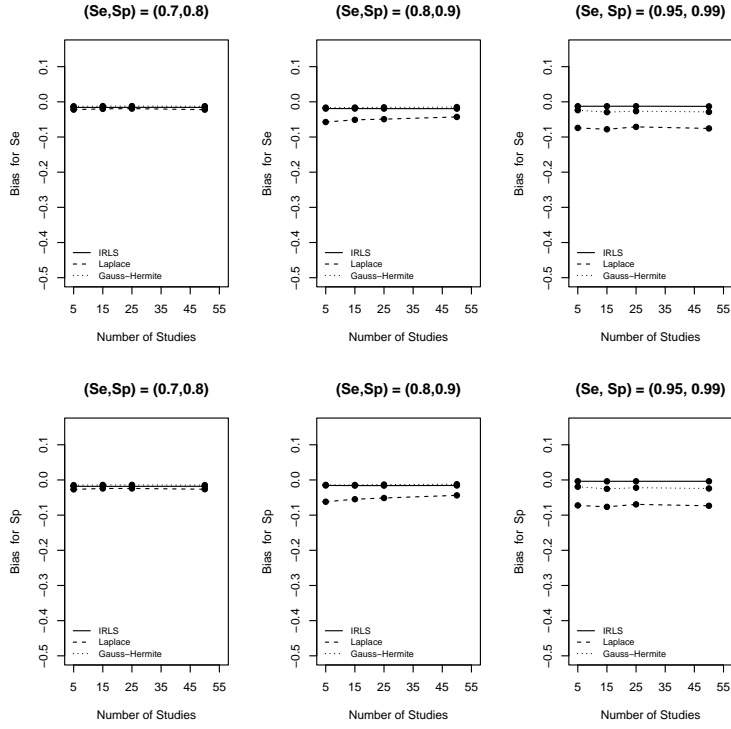

**Fig. B5:** Bias for sensitivity (Se) and specificity (Sp) based on the IRWLS (solid line), Laplace approximation (dashed line) and Gauss-Hermite quadrature (dotted line) when  $\sigma_1^2 = 1.59$ ,  $\sigma_2^2 = 1.83$ ,  $\sigma_{12} = -0.7$ ,  $n_1 = 50$ , and  $n_2 = 100$

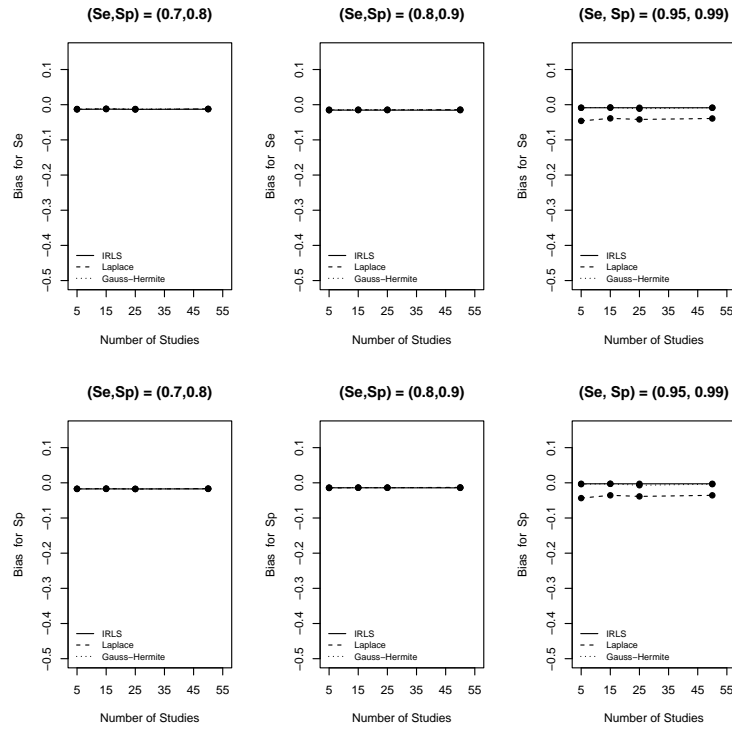

**Fig. B6:** Bias for sensitivity (Se) and specificity (Sp) based on the IRWLS (solid line), Laplace approximation (dashed line) and Gauss-Hermite quadrature (dotted line) when  $\sigma_1^2 = 1.59$ ,  $\sigma_2^2 = 1.83$ ,  $\sigma_{12} = -0.03$ ,  $n_1 = 300$ , and  $n_2 = 500$

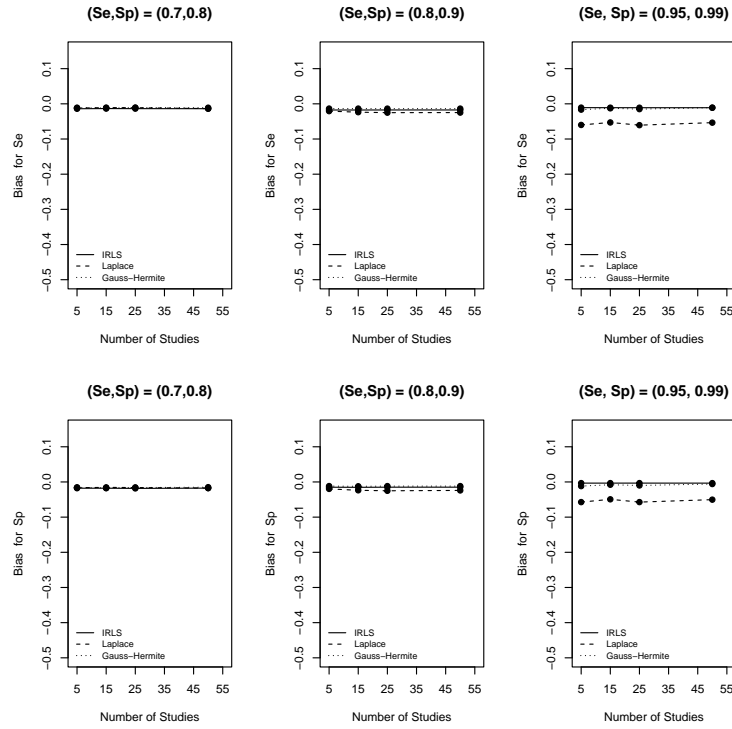

**Fig. B7:** Bias for sensitivity (Se) and specificity (Sp) based on the IRWLS (solid line), Laplace approximation (dashed line) and Gauss-Hermite quadrature (dotted line) when  $\sigma_1^2 = 1.59$ ,  $\sigma_2^2 = 1.83$ ,  $\sigma_{12} = -0.03$ ,  $n_1 = 100$ , and  $n_2 = 200$

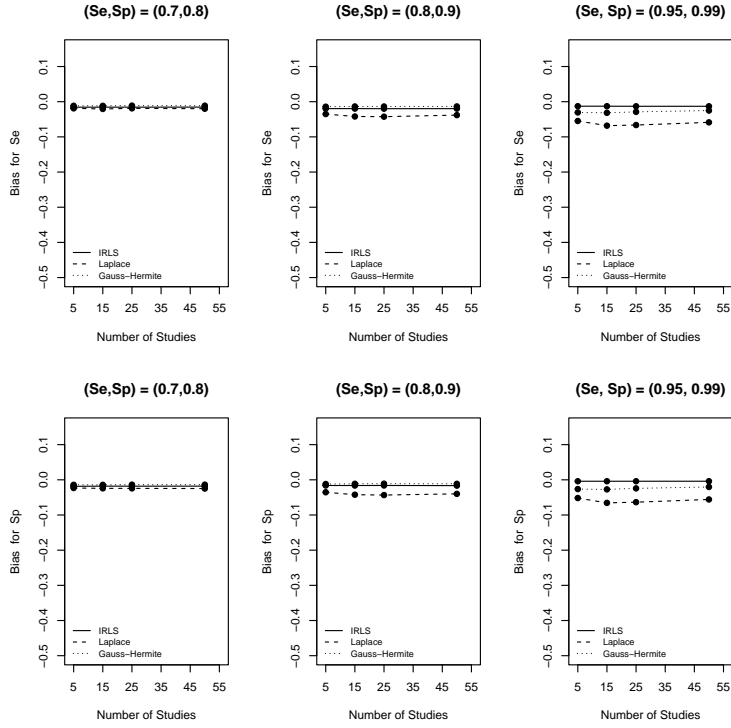

**Fig. B8:** Bias for sensitivity (Se) and specificity (Sp) based on the IRWLS (solid line), Laplace approximation (dashed line) and Gauss-Hermite quadrature (dotted line) when  $\sigma_1^2 = 1.59$ ,  $\sigma_2^2 = 1.83$ ,  $\sigma_{12} = -0.03$ ,  $n_1 = 50$ , and  $n_2 = 100$

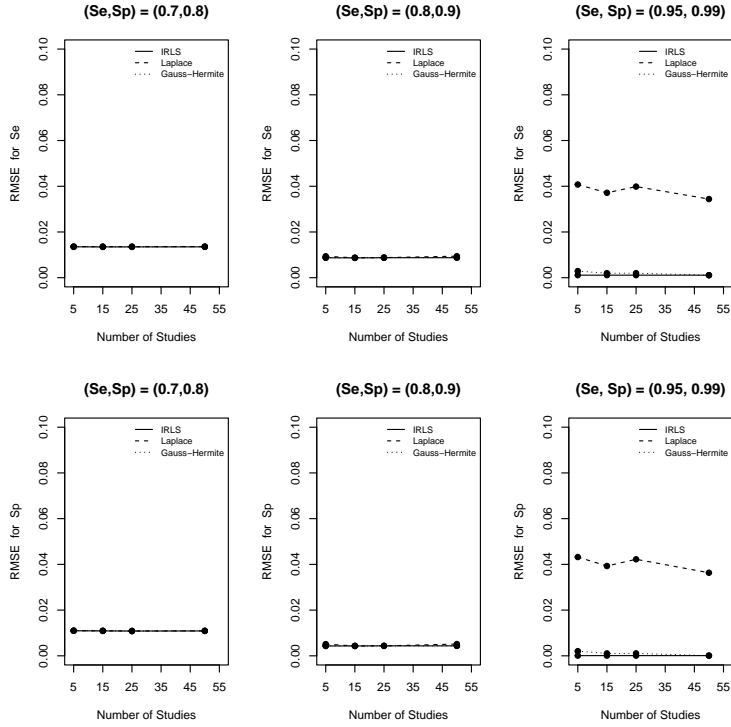

**Fig. B9:** RMSE for sensitivity (Se) and specificity (Sp) based on the IRWLS (solid line), Laplace approximation (dashed line) and Gauss-Hermite quadrature (dotted line) when  $\sigma_1^2 = 1.59$ ,  $\sigma_2^2 = 1.83$ ,  $\sigma_{12} = -0.7$ ,  $n_1 = 300$ , and  $n_2 = 500$



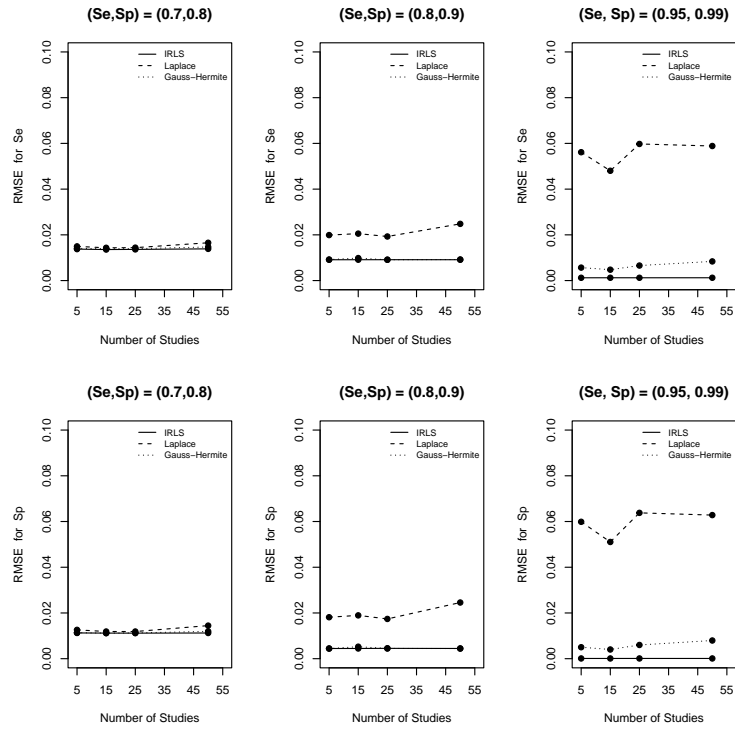

**Fig. B10:** RMSE for sensitivity (Se) and specificity (Sp) based on the IRWLS (solid line), Laplace approximation (dashed line) and Gauss-Hermite quadrature (dotted line) when  $\sigma_1^2 = 1.59$ ,  $\sigma_2^2 = 1.83$ ,  $\sigma_{12} = -0.7$ ,  $n_1 = 100$ , and  $n_2 = 200$

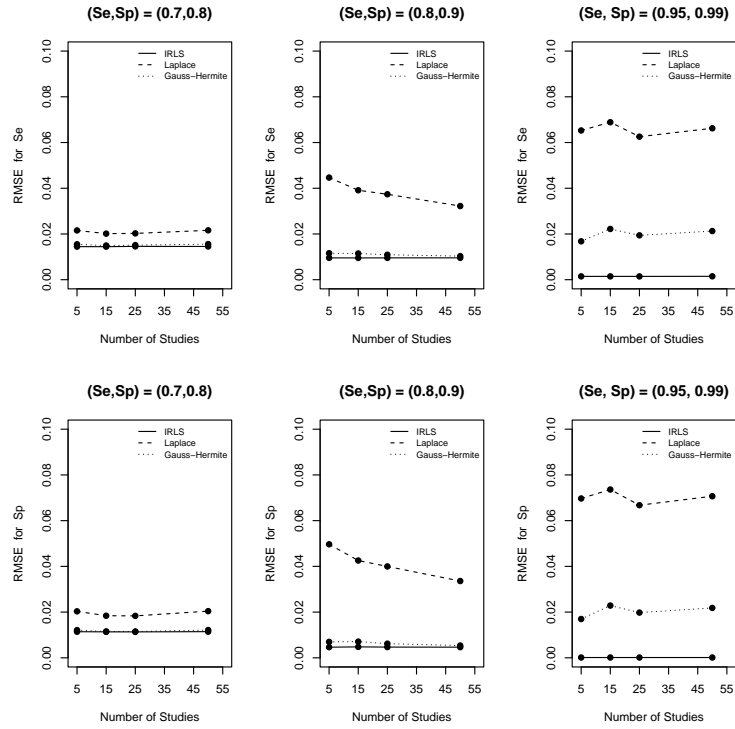

**Fig. B11:** RMSE for sensitivity (Se) and specificity (Sp) based on the IRWLS (solid line), Laplace approximation (dashed line) and Gauss-Hermite quadrature (dotted line) when  $\sigma_1^2 = 1.59$ ,  $\sigma_2^2 = 1.83$ ,  $\sigma_{12} = -0.7$ ,  $n_1 = 50$ , and  $n_2 = 100$

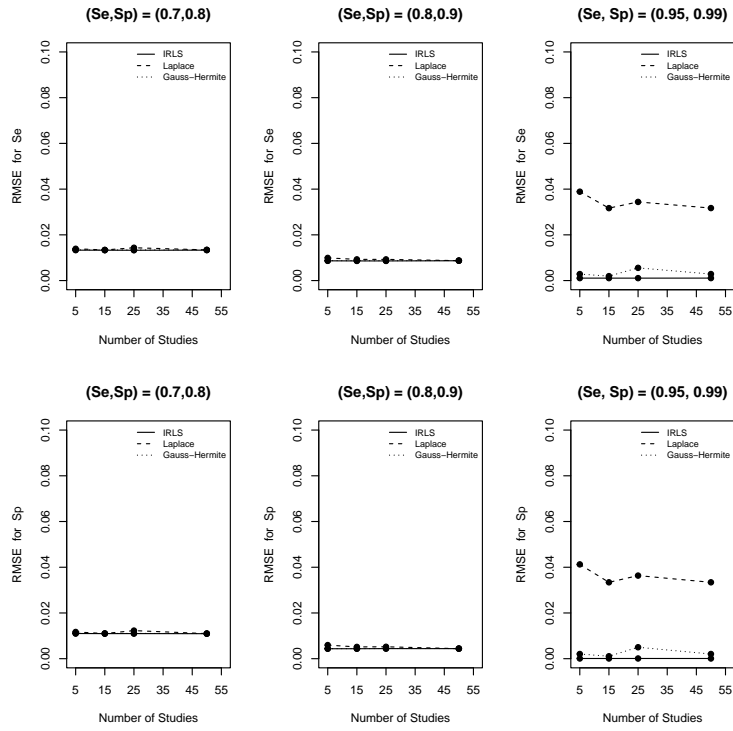

**Fig. B12:** RMSE for sensitivity (Se) and specificity (Sp) based on the IRWLS (solid line), Laplace approximation (dashed line) and Gauss-Hermite quadrature (dotted line) when  $\sigma_1^2 = 1.59$ ,  $\sigma_2^2 = 1.83$ ,  $\sigma_{12} = -0.03$ ,  $n_1 = 300$ , and  $n_2 = 500$

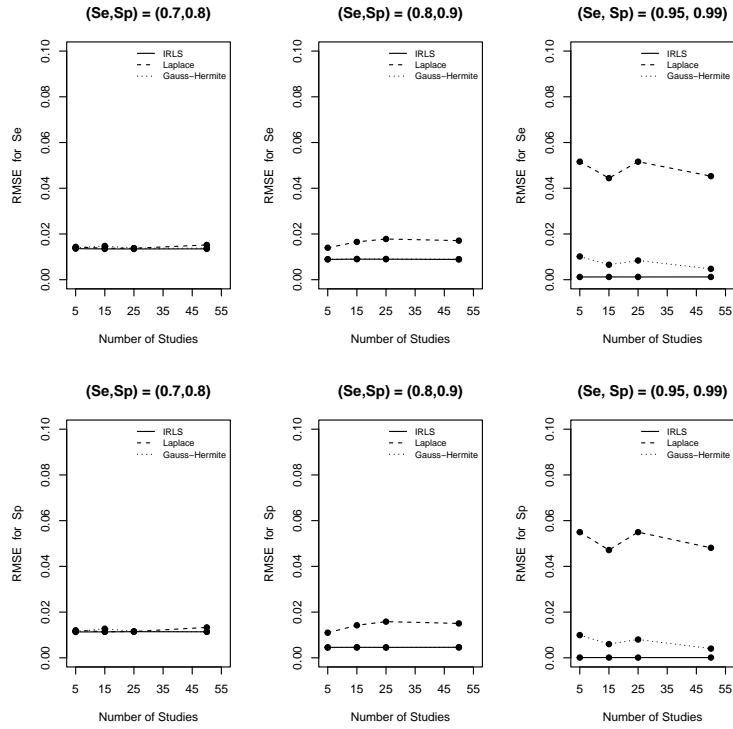

**Fig. B13:** RMSE for sensitivity (Se) and specificity (Sp) based on the IRWLS (solid line), Laplace approximation (dashed line) and Gauss-Hermite quadrature (dotted line) when  $\sigma_1^2 = 1.59$ ,  $\sigma_2^2 = 1.83$ ,  $\sigma_{12} = -0.03$ ,  $n_1 = 100$ , and  $n_2 = 200$

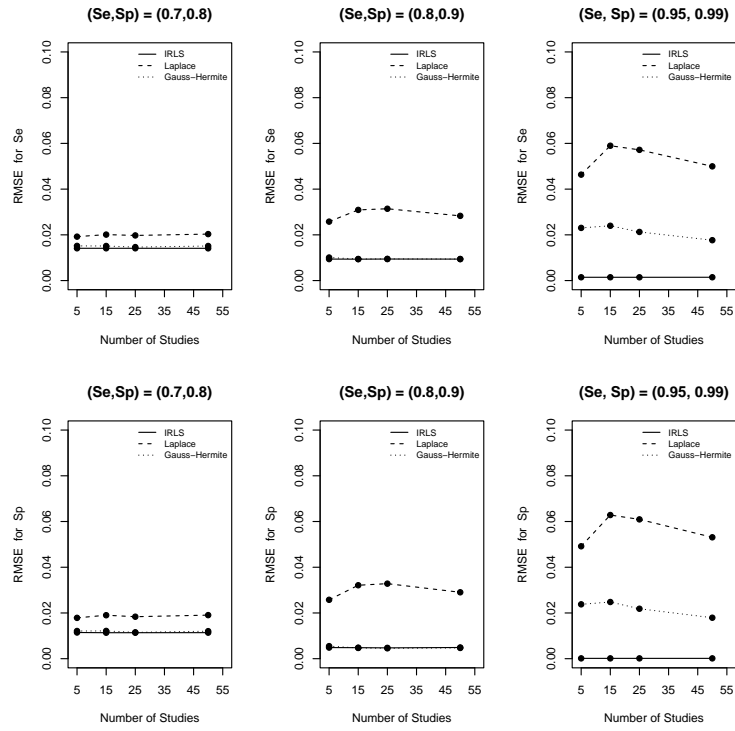

**Fig. B14:** RMSE for sensitivity (Se) and specificity (Sp) based on the IRWLS (solid line), Laplace approximation (dashed line) and Gauss-Hermite quadrature (dotted line) when  $\sigma_1^2 = 1.59$ ,  $\sigma_2^2 = 1.83$ ,  $\sigma_{12} = -0.03$ ,  $n_1 = 50$ , and  $n_2 = 100$

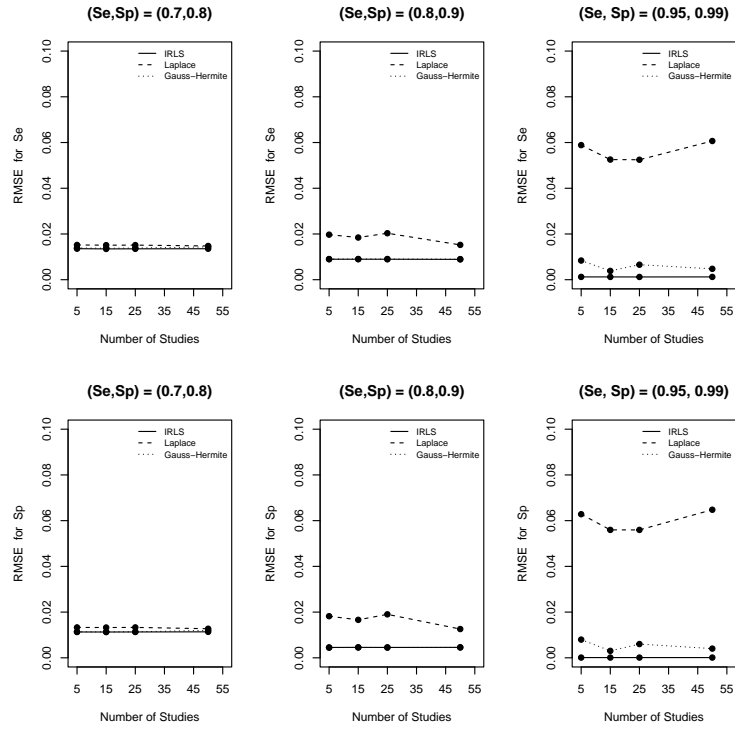

**Fig. B15:** RMSE for sensitivity (Se) and specificity (Sp) based on the IRWLS (solid line), Laplace approximation (dashed line) and Gauss-Hermite quadrature (dotted line) when  $\sigma_1^2 = 1.59$ ,  $\sigma_2^2 = 1.83$ ,  $\sigma_{12} = -0.34$ ,  $n_1 = 100$ , and  $n_2 = 200$

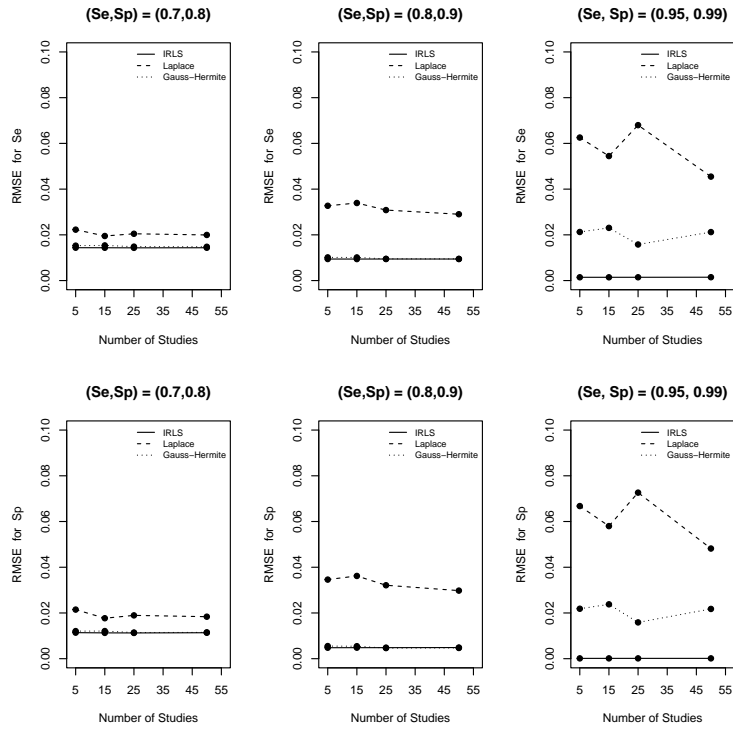

**Fig. B16:** RMSE for sensitivity (Se) and specificity (Sp) based on the IRWLS (solid line), Laplace approximation (dashed line) and Gauss-Hermite quadrature (dotted line) when  $\sigma_1^2 = 1.59$ ,  $\sigma_2^2 = 1.83$ ,  $\sigma_{12} = -0.34$ ,  $n_1 = 50$ , and  $n_2 = 100$

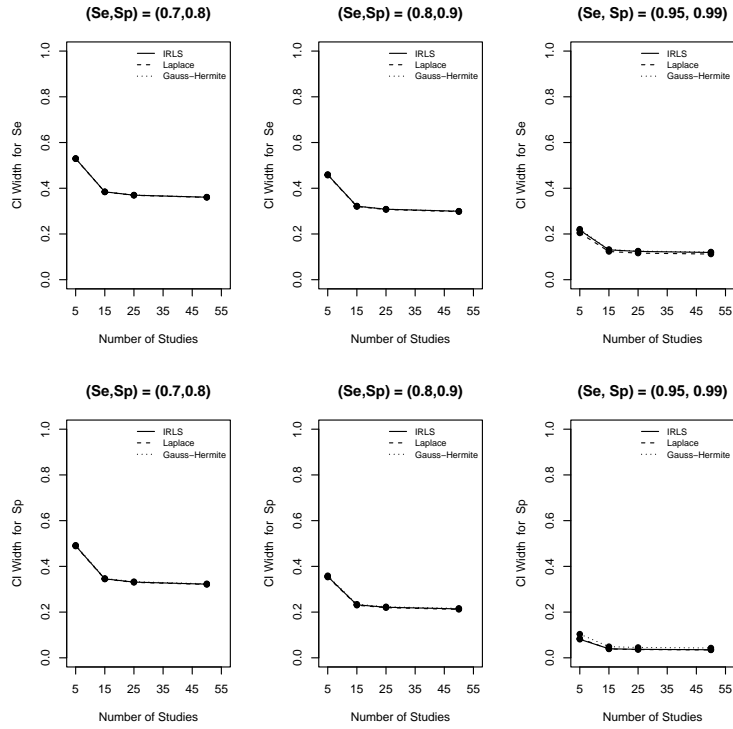

**Fig. B17:** CI width for sensitivity (Se) and specificity (Sp) based on the IRWLS (solid line), Laplace approximation (dashed line) and Gauss-Hermite quadrature (dotted line) when  $\sigma_1^2 = 1.59$ ,  $\sigma_2^2 = 1.83$ ,  $\sigma_{12} = -0.7$ ,  $n_1 = 300$ , and  $n_2 = 500$

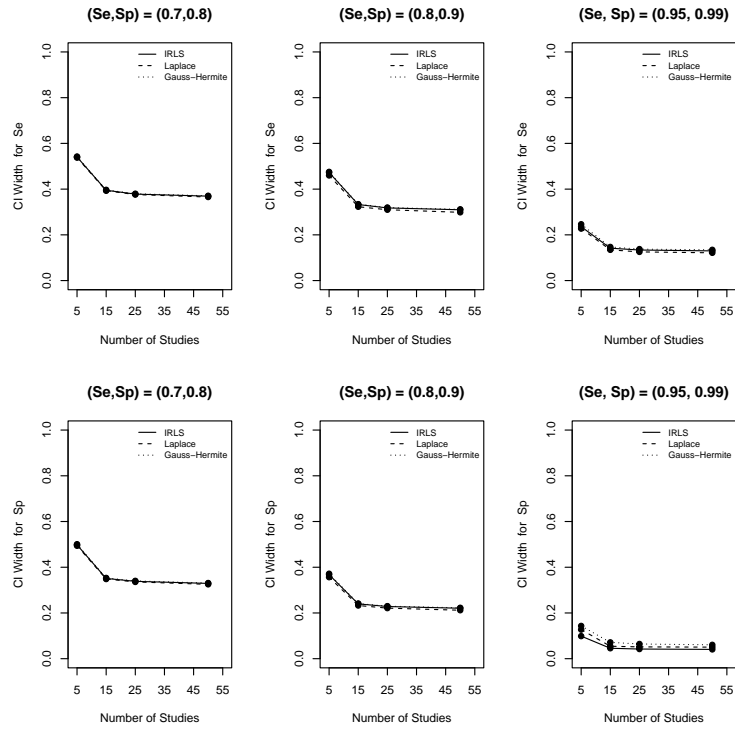

**Fig. B18:** CI width for sensitivity (Se) and specificity (Sp) based on the IRWLS (solid line), Laplace approximation (dashed line) and Gauss-Hermite quadrature (dotted line) when  $\sigma_1^2 = 1.59$ ,  $\sigma_2^2 = 1.83$ ,  $\sigma_{12} = -0.7$ ,  $n_1 = 100$ , and  $n_2 = 200$

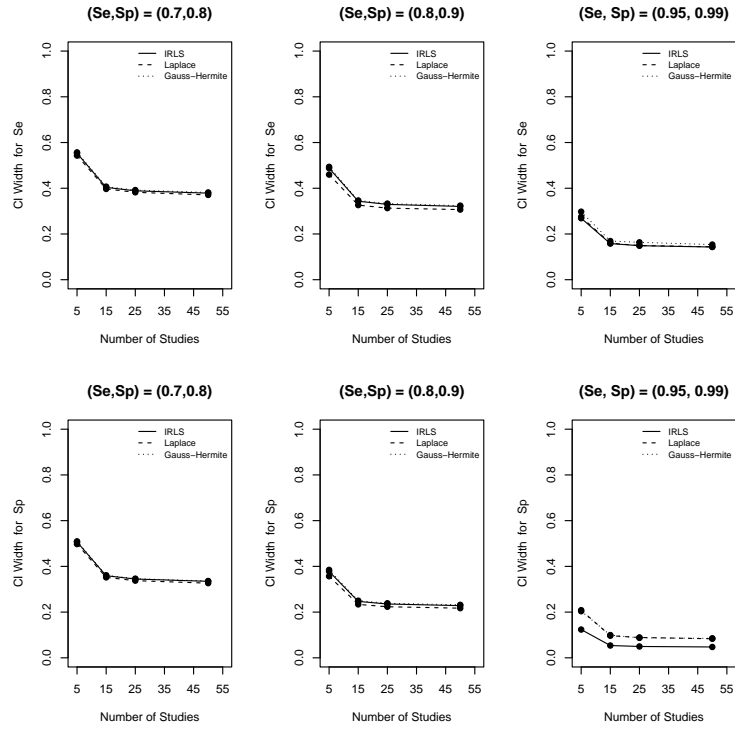

**Fig. B19:** CI width for sensitivity (Se) and specificity (Sp) based on the IRWLS (solid line), Laplace approximation (dashed line) and Gauss-Hermite quadrature (dotted line) when  $\sigma_1^2 = 1.59$ ,  $\sigma_2^2 = 1.83$ ,  $\sigma_{12} = -0.7$ ,  $n_1 = 50$ , and  $n_2 = 100$

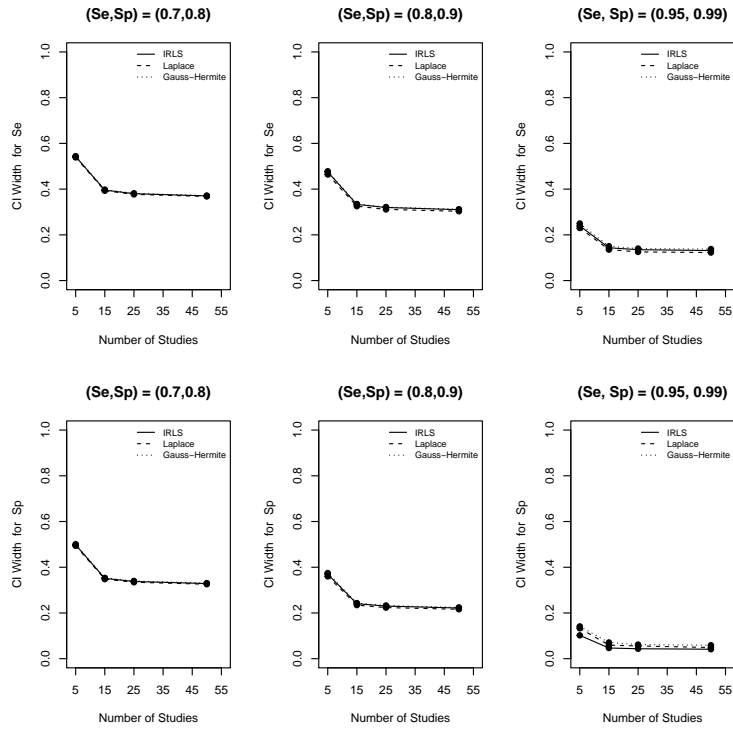

**Fig. B20:** CI width for sensitivity (Se) and specificity (Sp) based on the IRWLS (solid line), Laplace approximation (dashed line) and Gauss-Hermite quadrature (dotted line) when  $\sigma_1^2 = 1.59$ ,  $\sigma_2^2 = 1.83$ ,  $\sigma_{12} = -0.34$ ,  $n_1 = 100$ , and  $n_2 = 200$

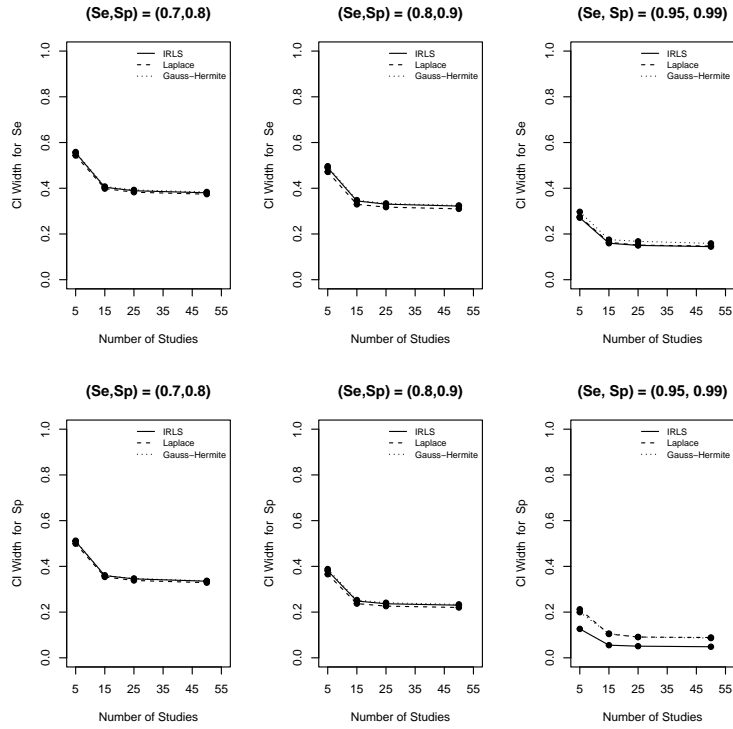

**Fig. B21:** CI width for sensitivity (Se) and specificity (Sp) based on the IRWLS (solid line), Laplace approximation (dashed line) and Gauss-Hermite quadrature (dotted line) when  $\sigma_1^2 = 1.59$ ,  $\sigma_2^2 = 1.83$ ,  $\sigma_{12} = -0.34$ ,  $n_1 = 50$ , and  $n_2 = 100$

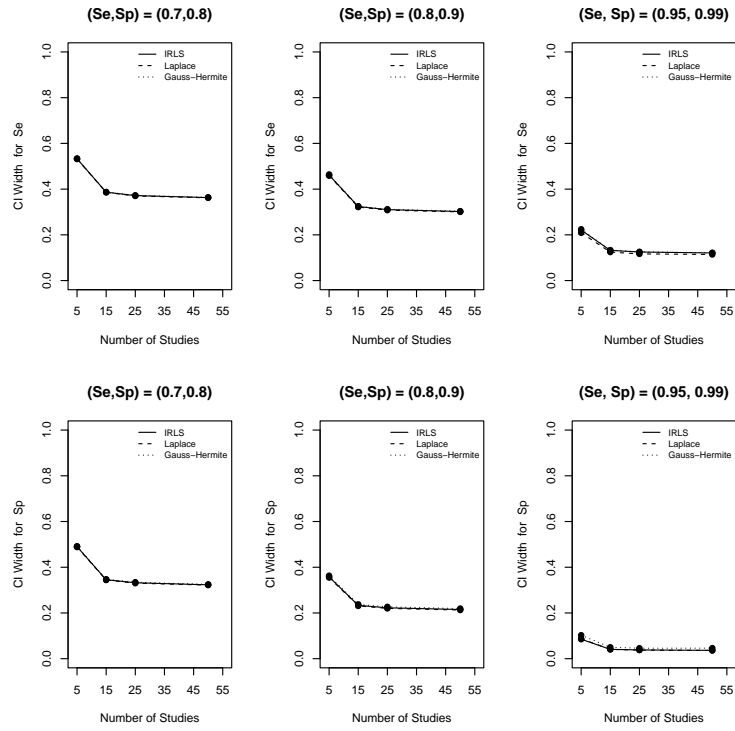

**Fig. B22:** CI width for sensitivity (Se) and specificity (Sp) based on the IRWLS (solid line), Laplace approximation (dashed line) and Gauss-Hermite quadrature (dotted line) when  $\sigma_1^2 = 1.59$ ,  $\sigma_2^2 = 1.83$ ,  $\sigma_{12} = -0.03$ ,  $n_1 = 300$ , and  $n_2 = 500$

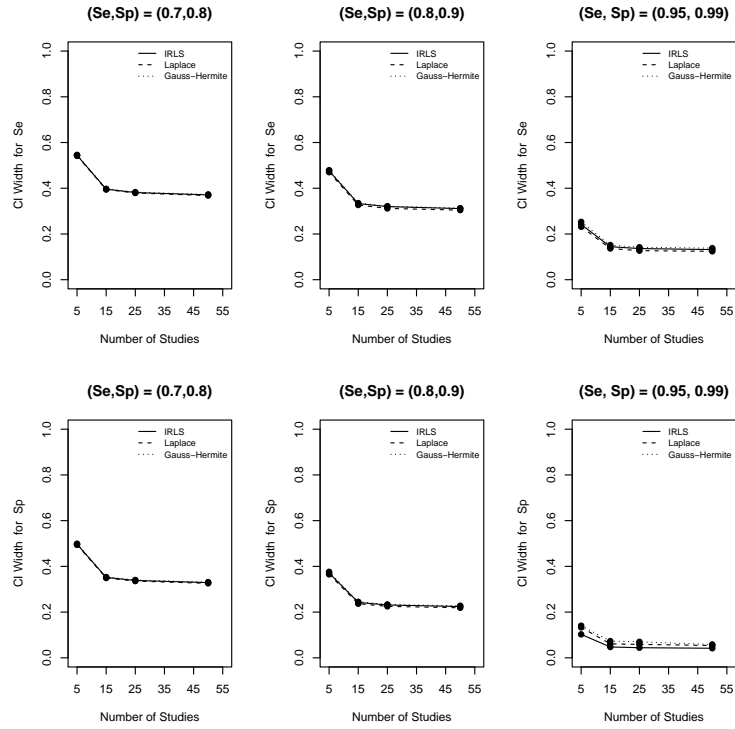

**Fig. B23:** CI width for sensitivity (Se) and specificity (Sp) based on the IRWLS (solid line), Laplace approximation (dashed line) and Gauss-Hermite quadrature (dotted line) when  $\sigma_1^2 = 1.59$ ,  $\sigma_2^2 = 1.83$ ,  $\sigma_{12} = -0.03$ ,  $n_1 = 100$ , and  $n_2 = 200$

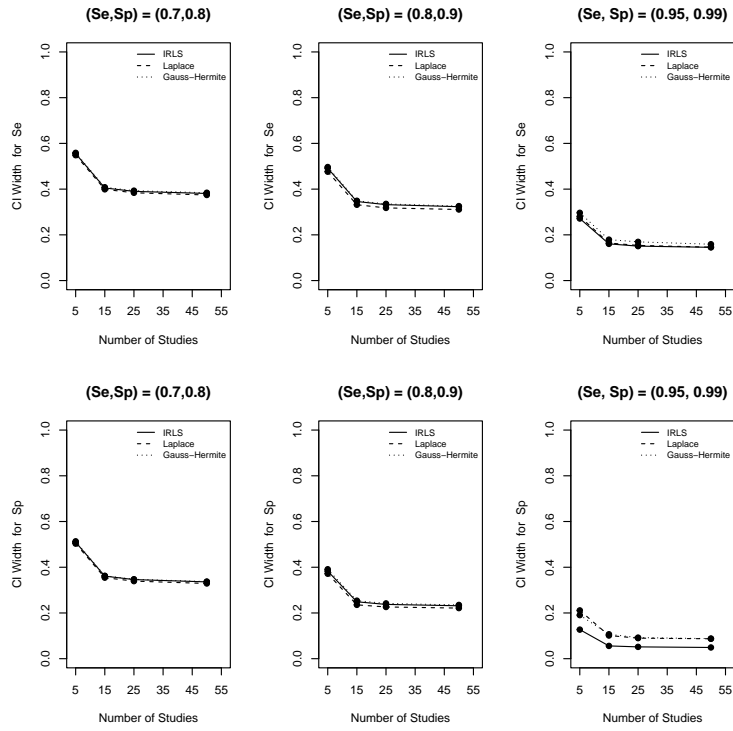

**Fig. B24:** CI width for sensitivity (Se) and specificity (Sp) based on the IRWLS (solid line), Laplace approximation (dashed line) and Gauss-Hermite quadrature (dotted line) when  $\sigma_1^2 = 1.59$ ,  $\sigma_2^2 = 1.83$ ,  $\sigma_{12} = -0.03$ ,  $n_1 = 50$ , and  $n_2 = 100$

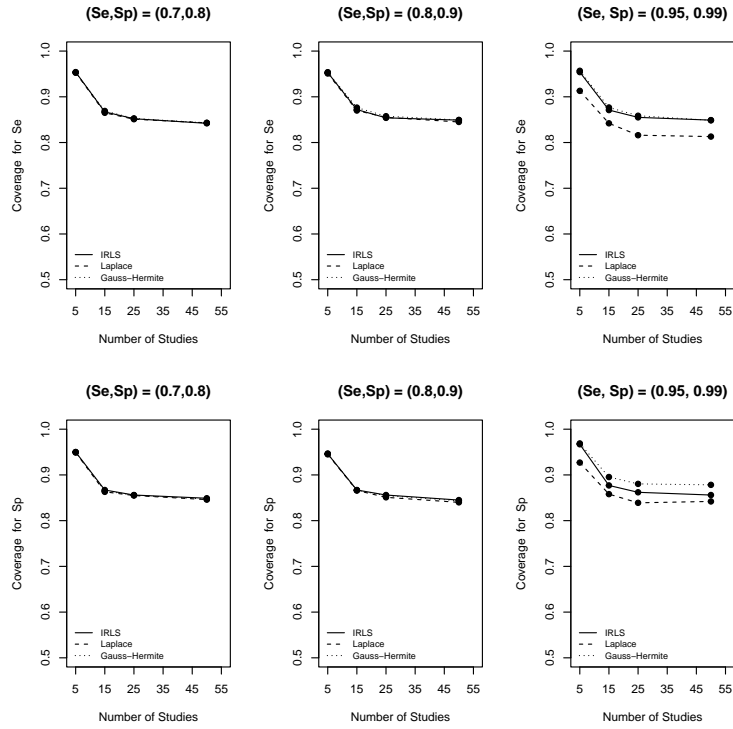

**Fig. B25:** Coverage for sensitivity (Se) and specificity (Sp) based on the IRWLS (solid line), Laplace approximation (dashed line) and Gauss-Hermite quadrature (dotted line) when  $\sigma_1^2 = 1.59$ ,  $\sigma_2^2 = 1.83$ ,  $\sigma_{12} = -0.7$ ,  $n_1 = 300$ , and  $n_2 = 500$



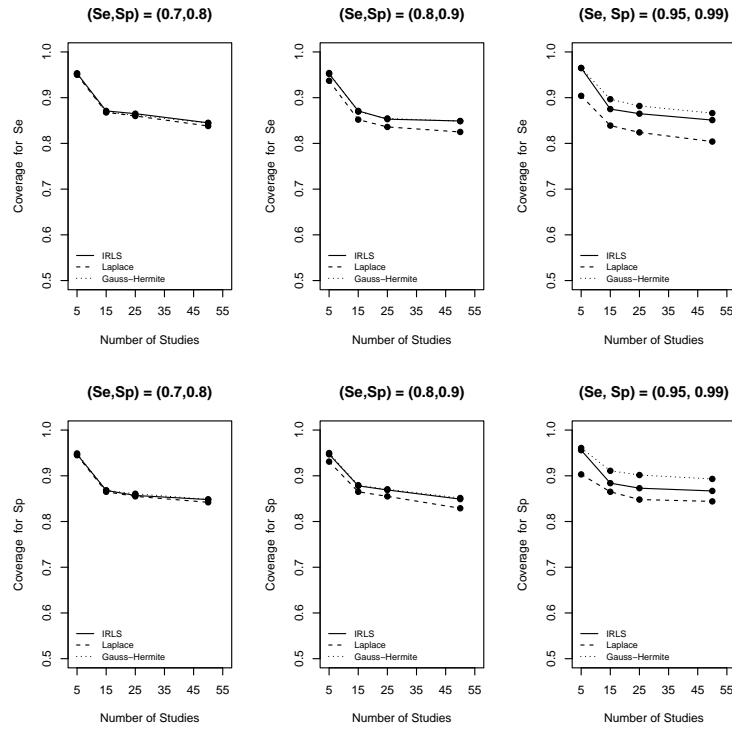

**Fig. B26:** Coverage for sensitivity (Se) and specificity (Sp) based on the IRWLS (solid line), Laplace approximation (dashed line) and Gauss-Hermite quadrature (dotted line) when  $\sigma_1^2 = 1.59$ ,  $\sigma_2^2 = 1.83$ ,  $\sigma_{12} = -0.7$ ,  $n_1 = 100$ , and  $n_2 = 200$

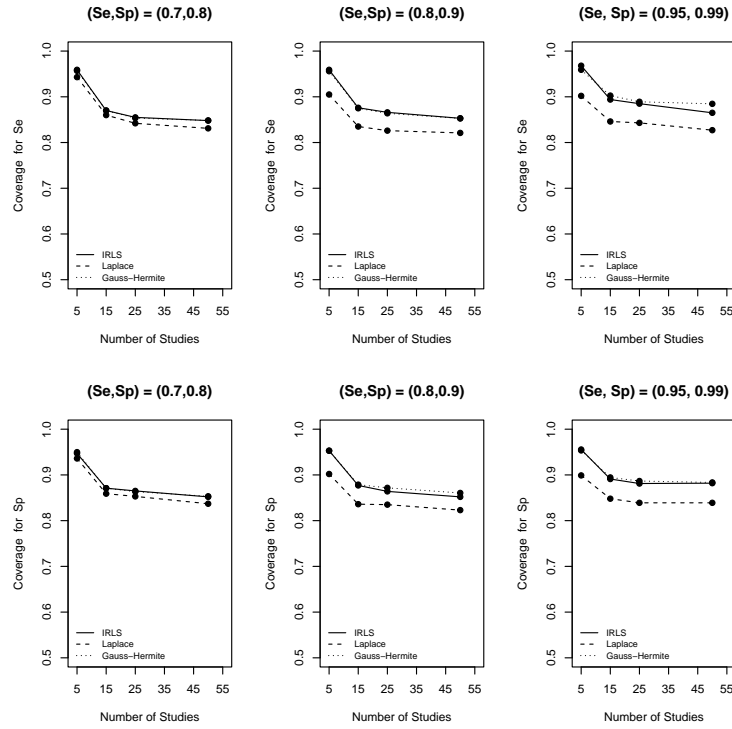

**Fig. B27:** Coverage for sensitivity (Se) and specificity (Sp) based on the IRWLS (solid line), Laplace approximation (dashed line) and Gauss-Hermite quadrature (dotted line) when  $\sigma_1^2 = 1.59$ ,  $\sigma_2^2 = 1.83$ ,  $\sigma_{12} = -0.7$ ,  $n_1 = 50$ , and  $n_2 = 100$

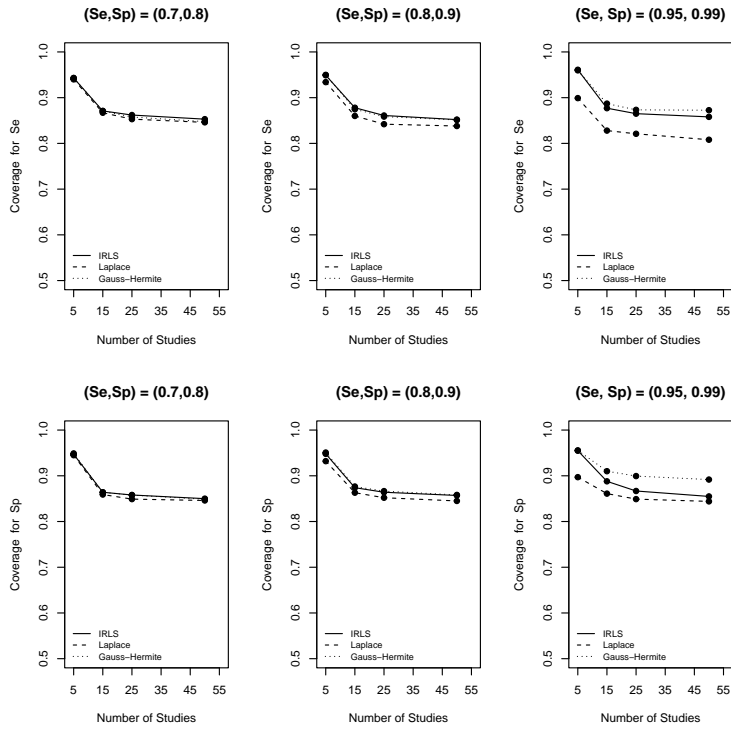

**Fig. B28:** Coverage for sensitivity (Se) and specificity (Sp) based on the IRWLS (solid line), Laplace approximation (dashed line) and Gauss-Hermite quadrature (dotted line) when  $\sigma_1^2 = 1.59$ ,  $\sigma_2^2 = 1.83$ ,  $\sigma_{12} = -0.34$ ,  $n_1 = 100$ , and  $n_2 = 200$

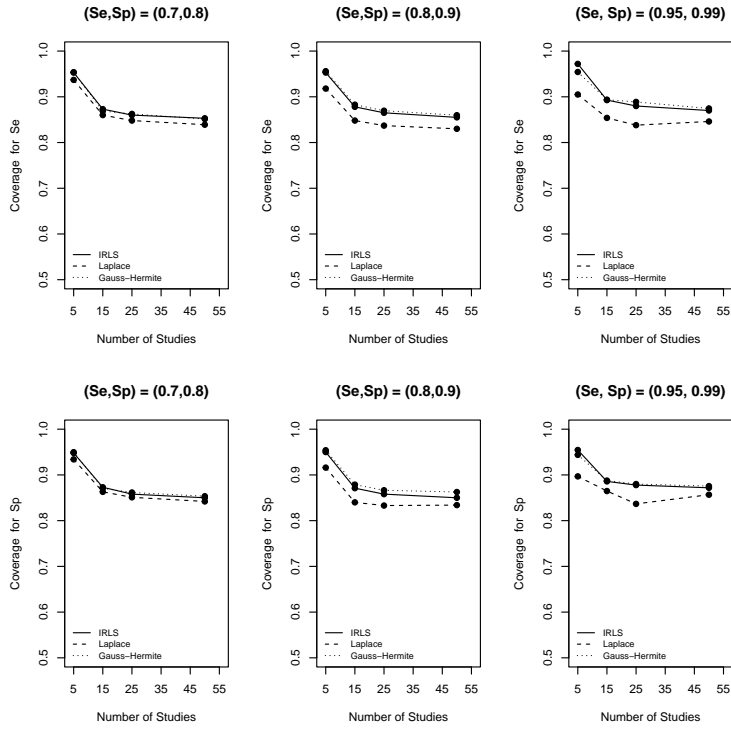

**Fig. B29:** Coverage for sensitivity (Se) and specificity (Sp) based on the IRWLS (solid line), Laplace approximation (dashed line) and Gauss-Hermite quadrature (dotted line) when  $\sigma_1^2 = 1.59$ ,  $\sigma_2^2 = 1.83$ ,  $\sigma_{12} = -0.34$ ,  $n_1 = 50$ , and  $n_2 = 100$

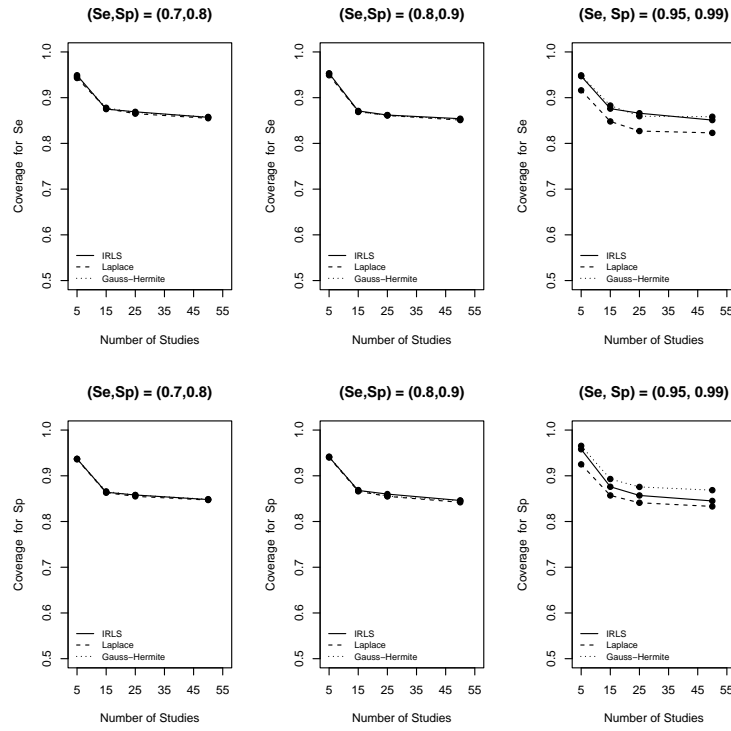

**Fig. B30:** Coverage for sensitivity (Se) and specificity (Sp) based on the IRWLS (solid line), Laplace approximation (dashed line) and Gauss-Hermite quadrature (dotted line) when  $\sigma_1^2 = 1.59$ ,  $\sigma_2^2 = 1.83$ ,  $\sigma_{12} = -0.03$ ,  $n_1 = 300$ , and  $n_2 = 500$

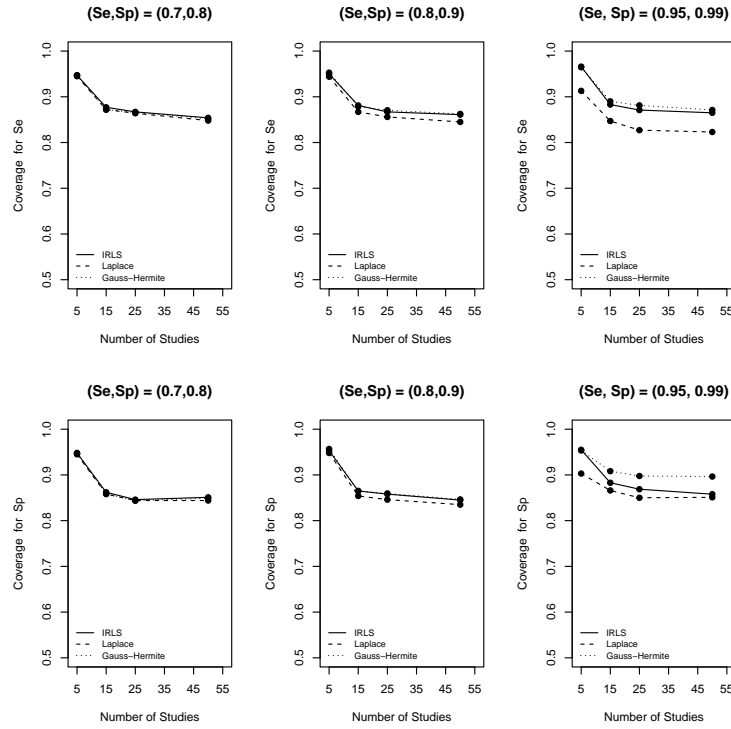

**Fig. B31:** Coverage for sensitivity (Se) and specificity (Sp) based on the IRWLS (solid line), Laplace approximation (dashed line) and Gauss-Hermite quadrature (dotted line) when  $\sigma_1^2 = 1.59$ ,  $\sigma_2^2 = 1.83$ ,  $\sigma_{12} = -0.03$ ,  $n_1 = 100$ , and  $n_2 = 200$

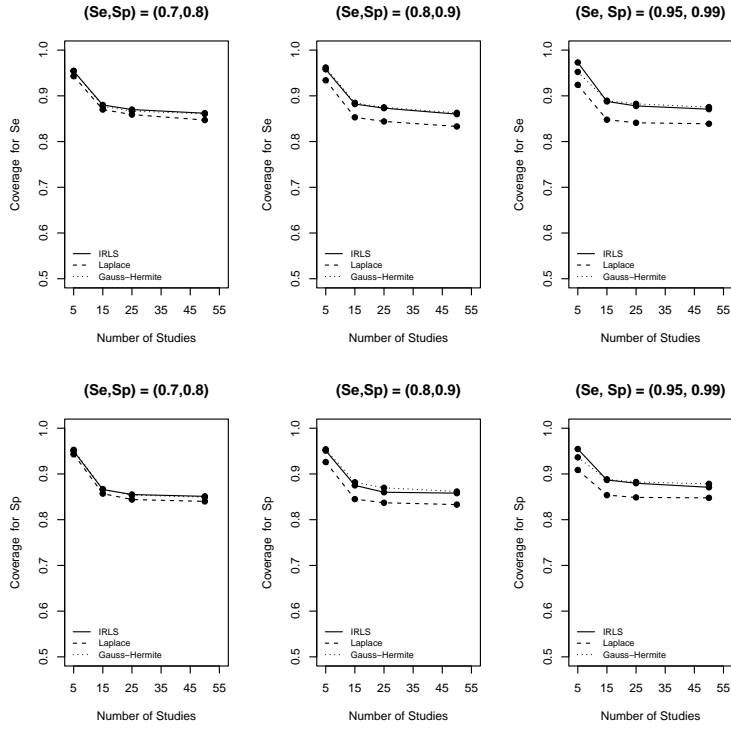

**Fig. B32:** Coverage for sensitivity (Se) and specificity (Sp) based on the IRWLS (solid line), Laplace approximation (dashed line) and Gauss-Hermite quadrature (dotted line) when  $\sigma_1^2 = 1.59$ ,  $\sigma_2^2 = 1.83$ ,  $\sigma_{12} = -0.03$ ,  $n_1 = 50$ , and  $n_2 = 100$

## Appendix C Application of the PQL algorithm to the two motivating meta-analyses

**Table C3:** Application of the PQL algorithm to the Vonasek et al. (2021) and Jullien et al. (2020) meta-analysis.

| Method                | Se (95% CI)              | Sp (95% CI)                 | $\sigma_1^2$          | $\sigma_{12}$ | $\sigma_2^2$        | Conv |
|-----------------------|--------------------------|-----------------------------|-----------------------|---------------|---------------------|------|
| Vonasek et al. (2021) |                          |                             |                       |               |                     |      |
| PQL                   | 0.4866 (0.3633, 0.6115)  | 0.7201 (0.5753, 0.8302)     | 0.8431                | -0.5990       | 1.3556              | Yes  |
| Jullien et al. (2020) |                          |                             |                       |               |                     |      |
| PQL                   | NA (NA, NA) <sup>a</sup> | 0.6951 (0, NA) <sup>b</sup> | $5.97 \times 10^{11}$ | 0.0000        | $41.14 \times 10^7$ | Yes  |

<sup>a</sup>The back-transformed sensitivity was not available because  $\text{logit}(\text{Se})$  was unusually large ( $3.9610 \times 10^{15}$ ). The confidence limits were not available because the standard error of  $\text{logit}(\text{Se})$  was unusually large ( $7.1625 \times 10^{13}$ ).

<sup>b</sup>The confidence limits for specificity were not available because the standard error of  $\text{logit}(\text{Sp})$  was unusually large ( $2.1316 \times 10^6$ ).
